# Supplementary material
Source: PubMed Central journal article supplement (PMC2427257)
Supplement: mmc2.pdf [file mmc2.pdf]

## Supplemental Data

### Walking the Interactome for Prioritization of Candidate Disease Genes

Sebastian Köhler, Sebastian Bauer, Denise Horn, and Peter N. Robinson

**Table S2. Enrichment Results with the Network Constructed from all Datasources Excluding Text Mining**

| Disease                                          | # Genes | RWR   | DK    | SP    | PROSPECTR | DI    | Entrez IDs                                                                                                                          |
|--------------------------------------------------|---------|-------|-------|-------|-----------|-------|-------------------------------------------------------------------------------------------------------------------------------------|
| <b>Monogenic</b>                                 |         |       |       |       |           |       |                                                                                                                                     |
| Progressive external ophthalmoplegia             | 4       | 26.46 | 27    | 25.79 | 1.22      | 25.57 | 291, 11232, 5428, 56652                                                                                                             |
| Charcot Marie Tooth Disease                      | 21      | 17.47 | 17.99 | 7.65  | 4.99      | 7.32  | 81846, 79628, 8565, 9927, 23095, 4000, 3315, 10397, 4747, 8898, 2705, 2617, 57716, 1959, 4359, 26353, 9516, 7879, 54332, 1785, 5376 |
| Generalized epilepsy with febrile seizures plus  | 4       | 5.44  | 9.14  | 1.6   | 6.23      | 0.87  | 2566, 2563, 6323, 6324                                                                                                              |
| Bardet-Biedl Syndrome                            | 13      | 8.63  | 8.61  | 2.55  | 1.37      | 0.84  | 8195, 129880, 22954, 582, 583, 84100, 585, 166379, 79140, 79738, 55212, 27241, 123016                                               |
| Bare lymphocyte syndrome type II                 | 4       | 50    | 50    | 43.75 | 1.09      | 43.75 | 5993, 5994, 8625, 4261                                                                                                              |
| Refsum disease                                   | 5       | 45    | 45    | 36.67 | 1.14      | 33.54 | 5264, 5828, 5189, 5191, 55670                                                                                                       |
| Leigh Syndrome                                   | 14      | 37.91 | 39.04 | 28.89 | 1.63      | 28.69 | 374291, 5160, 10128, 6389, 617, 4719, 6834, 4722, 4723, 9997, 1355, 4724, 1352, 4728                                                |
| Hemophagocytic lymphohistiocytosis               | 4       | 32.14 | 40.63 | 27.19 | 1.09      | 25.42 | 5873, 8676, 201294, 5551                                                                                                            |
| Leber congenital amaurosis                       | 9       | 3.84  | 3.9   | 1.83  | 5.09      | 0.89  | 145226, 23746, 1406, 3614, 3000, 6121, 80184, 57096, 23418                                                                          |
| Cholestasis                                      | 3       | 0.5   | 0.5   | 0.5   | 3.35      | 0.5   | 5244, 5205, 8647                                                                                                                    |
| Nonbullous congenital ichthyosiform erythroderma | 4       | 1.53  | 1.89  | 0.92  | 2.48      | 0.87  | 51099, 7051, 242, 59344                                                                                                             |

*AJHG*, Volume 82

|                                    |    |       |       |       |       |       |                                                                                     |
|------------------------------------|----|-------|-------|-------|-------|-------|-------------------------------------------------------------------------------------|
| Atypical mycobacteriosis, familial | 6  | 45.83 | 34.72 | 12.48 | 2.23  | 12.22 | 3459, 8517, 3593, 6772, 3594, 3460                                                  |
| Ectodermal dysplasia               | 3  | 50    | 50    | 41.67 | 1.21  | 41.67 | 1896, 10913, 128178                                                                 |
| Amyotrophic lateral sclerosis      | 8  | 2.51  | 4.99  | 1.07  | 1.88  | 0.89  | 4744, 57679, 283, 23064, 6647, 9217, 5630, 1639                                     |
| Keratosis palmoplantaris striata   | 3  | 29.17 | 25.56 | 20.83 | 2.97  | 19.79 | 1832, 3848, 1828                                                                    |
| Hirschsprung Disease               | 6  | 38.06 | 42.26 | 34.07 | 4.09  | 33.65 | 5979, 9839, 1889, 1908, 2668, 1910                                                  |
| Polycystic kidney disease          | 3  | 33.67 | 33.65 | 33.65 | 11.47 | 33.64 | 5314, 5311, 5310                                                                    |
| Spastic paraplegia                 | 7  | 15.22 | 16.28 | 14.9  | 8.2   | 14.83 | 23111, 51062, 80208, 51324, 6687, 5354, 6683                                        |
| Arthrogryposis                     | 4  | 31.38 | 37.63 | 31.38 | 2.01  | 25.34 | 4621, 7136, 7169, 7140                                                              |
| Amyloidosis VI                     | 3  | 36.67 | 36.67 | 34.62 | 3.83  | 33.64 | 9445, 351, 1471                                                                     |
| Chondrodysplasia punctata          | 14 | 38.43 | 40.01 | 32.63 | 1.75  | 32.52 | 5193, 5828, 415, 5192, 2677, 5830, 5189, 8540, 5191, 5190, 8504, 10682, 8443, 55670 |
| Nemaline myopathy                  | 6  | 31.75 | 29.17 | 11.75 | 3.98  | 10.3  | 7169, 58, 7138, 1073, 7170, 4703                                                    |
| Nephronophthisis, hereditary       | 4  | 43.75 | 43.75 | 43.75 | 2.45  | 43.75 | 27130, 261734, 4867, 27031                                                          |
| Waardenburg syndrome               | 6  | 42.59 | 43.33 | 38.1  | 2.6   | 37.68 | 6663, 4286, 6591, 1908, 5077, 1910                                                  |
| Fundus albipunctatus               | 3  | 33.65 | 33.63 | 33.6  | 4.12  | 33.6  | 5961, 6017, 5959                                                                    |
| Maple-syrup urine disease          | 4  | 50    | 50    | 37.5  | 3.72  | 37.5  | 593, 594, 1629, 1738                                                                |
| Brachydactyly                      | 5  | 22.17 | 22.99 | 21.02 | 2.15  | 20.55 | 3239, 8200, 3549, 4920, 658                                                         |
| Amyloidosis, familial visceral     | 3  | 35    | 29.17 | 33.77 | 2.01  | 33.65 | 4069, 335, 2243                                                                     |
| Primary open-angle glaucoma        | 3  | 2.99  | 4.07  | 1.12  | 3.33  | 0.9   | 10133, 134430, 4653                                                                 |
| Congenital myasthenic syndromes    | 5  | 45    | 45    | 40    | 6.48  | 40    | 1134, 1145, 1144, 5913, 1140                                                        |
| Achromatopsia                      | 3  | 50    | 50    | 50    | 18.06 | 50    | 2780, 54714, 1261                                                                   |
| Epidermolysis bullosa              | 12 | 47.92 | 45.83 | 27.08 | 10.05 | 27.08 | 3914, 3691, 3852, 1294, 1832, 3918, 1308, 3861, 977, 5339, 3909, 3655               |
| Hypertrophic cardiomyopathy        | 13 | 34.8  | 41.13 | 21.66 | 2.55  | 20.92 | 4607, 70, 859, 7137, 7139, 85366, 51422, 4624, 4625, 7273, 7168, 4633, 4634         |

*AJHG*, Volume 82

|                                              |    |       |       |       |       |       |                                                                           |
|----------------------------------------------|----|-------|-------|-------|-------|-------|---------------------------------------------------------------------------|
| Bile-acid synthesis defect, congenital       | 4  | 7.12  | 18.88 | 2.27  | 1.73  | 0.87  | 80270, 6718, 9420, 23600                                                  |
| Hypercholesterolemia, familial               | 3  | 33.76 | 33.73 | 33.7  | 4.43  | 33.7  | 338, 255738, 3949                                                         |
| Hypokalemic periodic paralysis               | 3  | 2.79  | 7.81  | 2.53  | 1.62  | 0.73  | 6329, 10008, 779                                                          |
| Cutis laxa                                   | 4  | 12.44 | 23.36 | 6.71  | 2.3   | 0.98  | 2006, 10516, 30008, 538                                                   |
| Fanconi anemia                               | 12 | 38.02 | 39.04 | 33.69 | 0.95  | 33.54 | 2187, 83990, 2189, 2188, 55120, 2177, 2175, 2176, 2178, 79728, 57697, 675 |
| Mitochondrial complex I deficiency disorders | 10 | 45.05 | 40.05 | 36.72 | 1.5   | 36.72 | 4722, 374291, 4723, 4720, 4726, 4724, 4728, 4729, 4719, 91942             |
| Holoprosencephaly                            | 6  | 38.19 | 39.58 | 33.59 | 7.03  | 33.51 | 6469, 7050, 6496, 7546, 5727, 2736                                        |
| Myoclonic dystonia                           | 3  | 18.8  | 19.91 | 1.49  | 4.52  | 0.85  | 8910, 1813, 1861                                                          |
| Adrenoleukodystrophy                         | 5  | 50    | 50    | 45    | 0.94  | 45    | 5192, 5830, 5194, 5189, 55670                                             |
| Night-blindness, congenital stationary       | 7  | 36.18 | 36.58 | 32.45 | 2.03  | 32.35 | 6010, 2779, 2916, 60506, 57010, 778, 5158                                 |
| Long QT Syndrome                             | 10 | 29.66 | 30.92 | 21.33 | 8.66  | 20.45 | 6331, 84920, 775, 9992, 3759, 3784, 3757, 9722, 287, 3753                 |
| Primary microcephaly                         | 4  | 2.37  | 2.35  | 1.14  | 0.98  | 0.85  | 55835, 55755, 259266, 79648                                               |
| Hyper-IgM syndrome                           | 4  | 26.44 | 30.95 | 25.49 | 2.47  | 25.44 | 958, 959, 7374, 57379                                                     |
| Pituitary dwarfism                           | 4  | 29.02 | 38.28 | 26.1  | 8.07  | 25.54 | 8820, 5449, 8022, 5626                                                    |
| Familial hyperinsulinemic hypoglycemia       | 6  | 23.26 | 22.26 | 8.48  | 3.34  | 7.54  | 3767, 3033, 2645, 2746, 3643, 6833                                        |
| Bare lymphocyte syndrome type I              | 3  | 50    | 50    | 16.67 | 1.43  | 16.67 | 6890, 6891, 6892                                                          |
| Hemochromatosis                              | 5  | 50    | 50    | 50    | 2.3   | 40.32 | 30061, 57817, 7036, 3077, 148738                                          |
| Familial exudative vitreoretinopathy         | 3  | 50    | 50    | 50    | 17.68 | 50    | 4693, 8322, 4041                                                          |
| Xeroderma pigmentosum                        | 8  | 44.17 | 35.94 | 25.25 | 1.96  | 25.1  | 1643, 2068, 2071, 2073, 2072, 7508, 7507, 5429                            |
| Osteopetrosis                                | 5  | 20.9  | 20.66 | 20.52 | 5.51  | 20.48 | 1186, 760, 28962, 4041, 10312                                             |
| Ehlers Danlos syndrome                       | 9  | 18.63 | 23.05 | 9.66  | 7.87  | 7.58  | 1290, 5351, 1289, 7148, 1278, 1277, 1281, 11285, 9509                     |
| Hermansky-Pudlak syndrome                    | 8  | 41.32 | 37.15 | 29.32 | 1.18  | 29.28 | 388552, 8546, 84343,                                                      |

AJHG, Volume 82

|                                                   |    |       |       |       |       |       |                                                                                                                                                                                                                                                                               |
|---------------------------------------------------|----|-------|-------|-------|-------|-------|-------------------------------------------------------------------------------------------------------------------------------------------------------------------------------------------------------------------------------------------------------------------------------|
|                                                   |    |       |       |       |       |       | 89781, 11234, 3257, 79803, 84062                                                                                                                                                                                                                                              |
| Joubert syndrome                                  | 4  | 2.41  | 1.69  | 1.92  | 1.88  | 0.89  | 91147, 4867, 54806, 80184                                                                                                                                                                                                                                                     |
| Multiple epiphyseal dysplasia AD                  | 5  | 43.33 | 45    | 25.29 | 15.32 | 20.51 | 1311, 4148, 1299, 1298, 1297                                                                                                                                                                                                                                                  |
| Stickler syndrome                                 | 4  | 50    | 50    | 14.58 | 3.67  | 0.92  | 1280, 1297, 1302, 1301                                                                                                                                                                                                                                                        |
| Kartagener syndrome                               | 3  | 0.59  | 0.59  | 0.59  | 22.82 | 0.59  | 8701, 1767, 27019                                                                                                                                                                                                                                                             |
| Peters anomaly                                    | 4  | 4.3   | 2.49  | 4.31  | 5.27  | 1.04  | 5080, 1545, 2296, 5308                                                                                                                                                                                                                                                        |
| Kallmann syndrome                                 | 4  | 2.54  | 2.85  | 1     | 2.24  | 0.85  | 3730, 60675, 2260, 128674                                                                                                                                                                                                                                                     |
| Retinitis pigmentosa                              | 20 | 14.55 | 16.79 | 8     | 6.93  | 7.51  | 25794, 6010, 26121, 3614, 6103, 10594, 6102, 6101, 6100, 375298, 7287, 57096, 64218, 4901, 762, 5961, 9129, 24, 6121, 23418                                                                                                                                                   |
| Cataract, autosomal dominant                      | 11 | 27.64 | 27.64 | 25.32 | 1.63  | 25.31 | 1427, 2700, 1409, 2703, 1415, 1414, 4284, 8419, 1421, 5309, 1420                                                                                                                                                                                                              |
| Nonsyndromic hearing loss                         | 41 | 15.98 | 16.8  | 7.62  | 8.48  | 7.47  | 10804, 71, 7466, 64699, 1428, 2070, 1302, 79977, 53904, 9132, 1834, 64072, 4627, 25861, 10083, 51168, 7007, 5172, 65217, 1729, 146183, 375611, 4647, 4646, 117531, 9381, 222662, 11078, 4640, 83715, 5459, 2706, 2707, 153562, 79784, 1687, 23562, 6495, 259236, 161497, 1690 |
| Neuronal ceroid lipofuscinosis                    | 7  | 1.53  | 1.32  | 1.13  | 10.02 | 0.91  | 1509, 1203, 5538, 1200, 1201, 2055, 54982                                                                                                                                                                                                                                     |
| Severe congenital neutropenia                     | 3  | 2.25  | 2.12  | 1.55  | 3.95  | 0.9   | 2672, 1991, 10456                                                                                                                                                                                                                                                             |
| Arrhythmogenic right ventricular dysplasia (ARVD) | 6  | 30.7  | 34.44 | 23.24 | 2.17  | 22.53 | 6262, 5318, 1832, 1829, 1824, 7043                                                                                                                                                                                                                                            |
| Pulmonary surfactant metabolism dysfunction       | 3  | 0.77  | 0.77  | 0.77  | 9.73  | 0.77  | 21, 6439, 6440                                                                                                                                                                                                                                                                |
| Elliptocytosis                                    | 4  | 41.67 | 35.42 | 35.42 | 1.82  | 35.42 | 6710, 6708, 2035, 6521                                                                                                                                                                                                                                                        |
| Cerebrooculofacioskeletal syndrome                | 4  | 43.75 | 50    | 43.75 | 2.53  | 43.75 | 2067, 2068, 2073, 2074                                                                                                                                                                                                                                                        |
| Aicardi-Goutieres syndrome                        | 2  | 0.69  | 0.69  | 0.69  | 1.68  | 0.69  | 10535, 79621                                                                                                                                                                                                                                                                  |
| Congenital central hypoventilation syndrome       | 6  | 33.74 | 29.47 | 18.2  | 4.13  | 17.22 | 627, 5979, 429, 8929, 1908, 2668                                                                                                                                                                                                                                              |

AJHG, Volume 82

|                                                                   |    |              |              |              |             |              |                                                                                                                        |
|-------------------------------------------------------------------|----|--------------|--------------|--------------|-------------|--------------|------------------------------------------------------------------------------------------------------------------------|
| Parkinson's disease                                               | 8  | 23.45        | 22.82        | 19.58        | 1.2         | 19.14        | 6622, 65018, 7345, 120892, 5071, 27429, 11315, 9627                                                                    |
| Noonan Syndrome, Costello syndrome, Cardiofaciocutaneous Syndrome | 9  | 39.35        | 30.33        | 20.91        | 7.83        | 20.83        | 5781, 5604, 5605, 4436, 6654, 3265, 4763, 3845, 673                                                                    |
| Spinocerebellar Ataxia                                            | 12 | 21.74        | 16.67        | 9.53         | 4.65        | 9.19         | 6314, 5521, 3748, 773, 25814, 4287, 6908, 5582, 6310, 6311, 6712, 2259                                                 |
| Juvenile myoclonic epilepsy                                       | 5  | 13.96        | 17.63        | 4.62         | 6.08        | 0.93         | 785, 2554, 2563, 114327, 1181                                                                                          |
| Limb-Girdle Muscle Dystrophy                                      | 14 | 34.6         | 36.27        | 23.86        | 5.76        | 23.53        | 79147, 9499, 4000, 22954, 8291, 859, 6443, 6442, 6445, 825, 6444, 7273, 8557, 10585                                    |
| Distal hereditary motor neuropathy                                | 7  | 12.82        | 12.22        | 6.78         | 1.8         | 6.54         | 26580, 3508, 3315, 26353, 23064, 1639, 2617                                                                            |
| Pseudohypoaldosteronism, type I, autosomal recessive              | 3  | 50           | 50           | 50           | 1.35        | 50           | 6340, 6337, 6338                                                                                                       |
| Microphthalmia                                                    | 9  | 14.62        | 25.03        | 2.27         | 3.4         | 0.92         | 8724, 6657, 3052, 30062, 54880, 5015, 64220, 338917, 4990                                                              |
| Dilated cardiomyopathy                                            | 20 | 19.48        | 23.66        | 11.3         | 4.82        | 10.85        | 5350, 6331, 70, 4607, 7112, 4000, 2070, 7139, 6444, 6901, 1674, 5664, 5663, 10060, 4625, 7273, 8048, 8557, 1756, 11155 |
| Leukoencephalopathy with vanishing white matter                   | 5  | 50           | 43.33        | 30.33        | 1.02        | 30.33        | 8892, 8893, 8890, 8891, 1967                                                                                           |
| Combined oxidative phosphorylation deficiency                     | 4  | 39.06        | 40.63        | 38.16        | 1.97        | 37.7         | 85476, 7284, 51021, 10102                                                                                              |
| Cornelia de Lange syndrome                                        | 3  | 50           | 50           | 50           | 5.16        | 50           | 8243, 9126, 25836                                                                                                      |
| Spondylocostal dysostosis                                         | 3  | 41.67        | 50           | 41.67        | 2.87        | 33.6         | 10683, 3955, 145873                                                                                                    |
| Multiple Acyl-CoA Dehydrogenase deficiency                        | 3  | 50           | 50           | 50           | 1.31        | 50           | 2110, 2109, 2108                                                                                                       |
| <b>Mean Enrichment</b>                                            |    | <b>28.31</b> | <b>28.96</b> | <b>21.84</b> | <b>4.33</b> | <b>20.82</b> |                                                                                                                        |
| <b>Complex</b>                                                    |    |              |              |              |             |              |                                                                                                                        |
| Obesity                                                           | 13 | 30.79        | 29.99        | 15.53        | 2.31        | 14.97        | 51738, 5167, 4160, 348, 5122, 7040, 154, 155, 9607, 3953, 3952, 51141, 5443                                            |
| Non-Insulin-Dependent Diabetes Mellitus                           | 19 | 18.76        | 17.46        | 8.12         | 3.93        | 7.81         | 3767, 2820, 5167, 6927, 3667, 5770, 6934, 5506, 3990, 6517, 4760, 2053, 6514, 6928, 56729, 3172,                       |

AJHG, Volume 82

|                                               |    |              |              |              |             |            |                                                                         |
|-----------------------------------------------|----|--------------|--------------|--------------|-------------|------------|-------------------------------------------------------------------------|
|                                               |    |              |              |              |             |            | 208, 9479, 11132                                                        |
| Essential hypertension                        | 12 | 21.45        | 18.1         | 11.69        | 3.46        | 11.08      | 118, 6401, 185, 4846, 7133, 1577, 5740, 8490, 1889, 2784, 481, 183      |
| Inflammatory Bowel Disease                    | 7  | 16.51        | 16.54        | 2.48         | 3.75        | 1.09       | 6584, 64127, 5243, 149233, 9231, 1673, 6583                             |
| Systemic lupus erythematoses                  | 7  | 9.62         | 13.37        | 2.85         | 3.82        | 0.96       | 26191, 7100, 1493, 5133, 1773, 2212, 7124                               |
| Pheochromocytoma                              | 7  | 25.85        | 20.69        | 7.36         | 10.27       | 6.28       | 5979, 4436, 4763, 6392, 6391, 6390, 7428                                |
| Rheumatoid arthritis                          | 7  | 14.52        | 18.16        | 3.77         | 4.4         | 0.89       | 26191, 4795, 3123, 23569, 6583, 861, 4261                               |
| Mycobacterium tuberculosis, susceptibility to | 6  | 7.25         | 14.86        | 2.63         | 1.89        | 0.96       | 30835, 6556, 6347, 7421, 4153, 3105                                     |
| Alzheimer Disease                             | 4  | 50           | 37.5         | 37.5         | 2.22        | 37.5       | 5663, 351, 348, 5664                                                    |
| Graves disease                                | 5  | 6.41         | 9.7          | 2.27         | 3.88        | 0.84       | 1493, 57623, 7421, 7038, 2638                                           |
| Maturity-Onset Diabetes of the Young (MODY)   | 9  | 29.09        | 28.98        | 19.29        | 5.46        | 18.92      | 2645, 4760, 6928, 6927, 3172, 1056, 3651, 6833, 8462                    |
| Age-Related Macular Degeneration              | 11 | 20.47        | 23.53        | 13.19        | 8.84        | 12.7       | 83872, 84839, 717, 10516, 629, 24, 5654, 2074, 3075, 3078, 10878        |
| <b>Mean Enrichment</b>                        |    | <b>20.89</b> | <b>20.74</b> | <b>10.56</b> | <b>4.52</b> | <b>9.5</b> |                                                                         |
| <b>Cancer</b>                                 |    |              |              |              |             |            |                                                                         |
| Medulloblastoma                               | 6  | 34.1         | 23.64        | 18.58        | 1.23        | 18.4       | 324, 51684, 1755, 675, 1499, 8643                                       |
| Hepataocellular carcinoma                     | 3  | 30.56        | 6.27         | 22.73        | 3.71        | 22.5       | 4233, 7157, 1499                                                        |
| Esophageal carcinoma                          | 10 | 15.47        | 13.53        | 7.46         | 2.11        | 7.16       | 50514, 324, 51741, 11178, 6049, 9940, 7048, 1630, 7157, 1029            |
| Juvenile myelomonocytic leukemia              | 6  | 25.89        | 28.45        | 11.8         | 12.34       | 11.54      | 5781, 4436, 4763, 23092, 3845, 4893                                     |
| Hereditary nonpolyposis colorectal cancer     | 7  | 43.65        | 43.18        | 36.05        | 2.03        | 35.85      | 4436, 2956, 7048, 4292, 5378, 5395, 27030                               |
| Bladder Cancer                                | 4  | 39.29        | 26.91        | 19.99        | 5.71        | 19.25      | 3265, 5925, 2261, 3845                                                  |
| Glioma of brain, familial                     | 22 | 24           | 12.13        | 6.86         | 4.11        | 6.69       | 9211, 4436, 5468, 4292, 5395, 11200, 5728, 675, 7248, 7249, 1029, 4771, |

AJHG, Volume 82

|                              |    |              |              |              |             |              |                                                                                                  |
|------------------------------|----|--------------|--------------|--------------|-------------|--------------|--------------------------------------------------------------------------------------------------|
|                              |    |              |              |              |             |              | 1030, 2735, 1956, 29998,<br>10446, 324, 29997, 4763,<br>7157, 8089                               |
| Prostate cancer              | 13 | 9.22         | 5.42         | 1.95         | 3.67        | 0.97         | 3732, 60528, 4601, 11200,<br>5728, 675, 6041, 463, 2048,<br>8379, 4481, 1316, 999                |
| Pancreatic carcinoma         | 6  | 35.21        | 14.62        | 23           | 1.45        | 22.9         | 7873, 4089, 3845, 7157,<br>675, 1029                                                             |
| Lung cancer                  | 5  | 35.24        | 12.81        | 18.85        | 3.04        | 18.74        | 1956, 5002, 3845, 7157,<br>673                                                                   |
| Thyroid carcinoma, papillary | 8  | 7.69         | 4.99         | 2.96         | 6.74        | 1.17         | 5979, 5573, 8030, 8031,<br>4914, 7170, 7175, 51592                                               |
| Breast cancer familial       | 15 | 25.49        | 20.38        | 6.23         | 1.64        | 6.08         | 580, 5290, 8202, 11200,<br>7764, 675, 672, 83990,<br>5002, 9821, 367, 79728,<br>7157, 5888, 8493 |
| <b>Mean Enrichment</b>       |    | <b>27.15</b> | <b>17.69</b> | <b>14.71</b> | <b>3.98</b> | <b>14.27</b> |                                                                                                  |

“RWR” denotes “random walk with restart.”

“DK” denotes “diffusion kernel.”

“SP” denotes “shortest path.”

“DI” denotes “direct interaction.”
